# Supplementary material
Source: Elsevier journal article supplement (https://www.sciencedirect.com/science/article/pii/S002175572100098X)
Supplement: mmc1 [file S002175572100098X:mmc1.docx]

**Supplementary Material 1 –** Databases search strategy

| **The Cochrane Library** | #1 MeSH descriptor: [Infant, Premature] explode all trees  #2 Infants, Premature or Premature Infant or Preterm Infants or Infant, Preterm or Infants, Preterm or Preterm Infant or Premature Infants or Neonatal Prematurity or Prematurity, Neonatal  #3 #1 or #2  #4 MeSH descriptor: [Infant, Extremely Premature] explode all trees  #5 Extremely Premature Infant or Infants, Extremely Premature or Premature Infant, Extremely or Premature Infants, Extremely or Extremely Preterm Infants or Extremely Preterm Infant or Infant, Extremely Preterm or Infants, Extremely Preterm or Preterm Infant, Extremely or Preterm Infants, Extremely or Extremely Premature Infants  #6 #4 or #5  #7 MeSH descriptor: [Infant, Low Birth Weight] explode all trees  #8 Low-Birth-Weight Infant or Infant, Low-Birth-Weight or Infants, Low-Birth-Weight or Low Birth Weight Infant or Low-Birth-Weight Infants or Low Birth Weight or Birth Weight, Low or Birth Weights, Low or Low Birth Weights  #9 #7 or #8  #10 MeSH descriptor: [Infant, Very Low Birth Weight] explode all trees  #11 Very-Low-Birth-Weight Infant or Infant, Very-Low-Birth-Weight or Infants, Very-Low-Birth-Weight or Very Low Birth Weight Infant or Very-Low-Birth-Weight Infants or Very Low Birth Weight  #12 #10 or #11  #13 MeSH descriptor: [Infant, Extremely Low Birth Weight] explode all trees  #14 Extremely Low Birth Weight Infant  #15 #13 or #14  #16 #3 or #6 or #9 or #12 or #15  #17 MeSH descriptor: [Kangaroo-Mother Care Method] explode all trees  #18 Care Method, Kangaroo-Mother or Care Methods, Kangaroo-Mother or Kangaroo Mother Care Method or Kangaroo-Mother Care Methods or Method, Kangaroo-Mother Care or Methods, Kangaroo-Mother Care or Kangaroo Mother Care or Care, Kangaroo Mother or Kangaroo-Mother Care or Care, Kangaroo-Mother  #19 #17 or #18  #20 #16 and #19 |
| --- | --- |
| **Pubmed** | #1 "Infant, Premature"[Mesh] or Infants, Premature or Premature Infant or Preterm Infants or Infant, Preterm or Infants, Preterm or Preterm Infant or Premature Infants or Neonatal Prematurity or Prematurity, Neonatal or "Infant, Extremely Premature"[Mesh] or Extremely Premature Infant or Infants, Extremely Premature or Premature Infant, Extremely or Premature Infants, Extremely or Extremely Preterm Infants or Extremely Preterm Infant or Infant, Extremely Preterm or Infants, Extremely Preterm or Preterm Infant, Extremely or Preterm Infants, Extremely or Extremely Premature Infants or "Infant, Low Birth Weight"[Mesh] or Low-Birth-Weight Infant or Infant, Low-Birth-Weight or Infants, Low-Birth-Weight or Low Birth Weight Infant or Low-Birth-Weight Infants or Low Birth Weight or Birth Weight, Low or Birth Weights, Low or Low Birth Weights or "Infant, Very Low Birth Weight"[Mesh] or Very-Low-Birth-Weight Infant or Infant, Very-Low-Birth-Weight or Infants, Very-Low-Birth-Weight or Very Low Birth Weight Infant or Very-Low-Birth-Weight Infants or Very Low Birth Weight or "Infant, Extremely Low Birth Weight"[Mesh] or Extremely Low Birth Weight Infant  #2 "Kangaroo-Mother Care Method"[Mesh] or Care Method, Kangaroo-Mother or Care Methods, Kangaroo-Mother or Kangaroo Mother Care Method or Kangaroo-Mother Care Methods or Method, Kangaroo-Mother Care or Methods, Kangaroo-Mother Care or Kangaroo Mother Care or Care, Kangaroo Mother or Kangaroo-Mother Care or Care, Kangaroo-Mother  #1 AND #2 |
| **Embase** | ('infant premature' OR 'extremely low birth weight'/exp OR 'low birth weight'/exp OR 'very low birth weight'/exp OR 'prematurity'/exp OR 'extremely premature infant' OR 'infant, extremely premature' OR 'infant, premature' OR 'infant, premature, diseases' OR 'neonate, premature' OR 'pre-mature infant' OR 'pre-term baby' OR 'pre-term child' OR 'pre-term infant' OR 'pre-term neonate' OR 'pre-term newborn' OR 'premature' OR 'premature baby' OR 'premature birth' OR 'premature child' OR 'premature childbirth' OR 'premature infant' OR 'premature infant disease' OR 'premature infant diseases' OR 'premature neonate' OR 'premature newborn' OR 'premature syndrome' OR 'prematuritas' OR 'prematurity' OR 'preterm baby' OR 'preterm child' OR 'preterm infant' OR 'preterm neonate' OR 'preterm newborn') AND ('kangaroo care'/exp OR 'kangaroo care' OR 'kangaroo mother care' OR 'kangaroo mother care method' OR 'kangaroo mother method' OR 'kangaroo-mother care method' OR 'skin to skin care') AND ('randomized controlled trial'/exp OR 'controlled trial, randomized' OR 'randomised controlled study' OR 'randomised controlled trial' OR 'randomized controlled study' OR 'randomized controlled trial' OR 'trial, randomized controlled') |
| **Scielo** | (“Recém-nascido prematuro”) or (Bebê Prematuro) or (Bebês Prematuros) or (Lactente Nascido Prematuramente) or (Lactente Nascido Pré-Termo) or (Lactente Prematuro) or (Lactente Pré-Termo) or (Lactentes Nascidos Prematuramente) or (Lactentes Nascidos Prematuros) or (Lactentes Nascidos Pré-Termo) or (Lactentes Prematuros) or (Lactentes Pré-Termo) or (Neonato Prematuro) or (Neonato Pré-Termo) or (Neonatos Prematuros) or (Neonatos Pré-Termo) or (Prematuridade) or (Prematuridade Neonatal) or (Prematuro) or (Pré-Termo) or (Prematuros) or (Recém-Nascido Pré-Termo) or (Recém-Nascidos Prematuros) or (Recém-Nascidos Pré-Termo) or (MH:M01.060.703.520.520$) or (“Lactente extremamente prematuro”) or (Prematuro Extremo) or (MH:M01.060.703.520.520.500$) or (“Nascimento Prematuro”) or (MH:C13.703.420.491.500$) or (“Baixo Peso ao Nascer”) or (Recém-nascido de baixo peso) or (MH:M01.060.703.520.460$) or (“Recém-nascido de extremo baixo peso”) or (Recém-Nascido de peso extremamente baixo ao nascer) or (Peso Extremamente Baixo ao Nascer) or (MH:M01.060.703.520.460.600.500$) or (“Peso muito Baixo ao Nascer”) or (Recém-nascido de muito baixo peso) or (Muito Baixo Peso ao Nascer) or (MH:M01.060.703.520.460.600$) [Todos os índices] and (“Método Canguru”) or (Mãe Canguru) or (Método Mãe-Canguru) or (Método Mãe Canguru) or (Projeto Mãe-Canguru) or (MH:E02.760.670.500$) or (MH:N02.421.088.120.140$) or (MH:N02.421.585.700.500$) or (“Atenção Humanizada ao Recém-nascido de baixo peso”) or (MH:SP2.006.027.023$) [Todos os índices] |
| **LILACS** | (tw:(("Recém-nascido prematuro") OR (bebê prematuro) OR (bebês prematuros) OR (lactente nascido prematuramente) OR (lactente nascido pré-termo) OR (lactente prematuro) OR (lactente pré-termo) OR (lactentes nascidos prematuramente) OR (lactentes nascidos prematuros) OR (lactentes nascidos pré-termo) OR (lactentes prematuros) OR (lactentes pré-termo) OR (neonato prematuro) OR (neonato pré-termo) OR (neonatos prematuros) OR (neonatos pré-termo) OR (prematuridade) OR (prematuridade neonatal) OR (prematuro) OR (pré-termo) OR (prematuros) OR (recém-nascido pré-termo) OR (recém-nascidos prematuros) OR (recém-nascidos pré-termo) OR (mh:m01.060.703.520.520*) OR ("Lactente extremamente prematuro") OR (prematuro extremo) OR (mh:m01.060.703.520.520.500*) OR ("Nascimento Prematuro") OR (mh:c13.703.420.491.500*) OR ("Baixo Peso ao Nascer") OR (recém-nascido de baixo peso) OR (mh:m01.060.703.520.460*) OR ("Recém-nascido de extremo baixo peso") OR (recém-nascido de peso extremamente baixo ao nascer) OR (peso extremamente baixo ao nascer) OR (mh:m01.060.703.520.460.600.500*) OR ("Peso muito Baixo ao Nascer") OR (recém-nascido de muito baixo peso) OR (muito baixo peso ao nascer) OR (mh:m01.060.703.520.460.600*) )) AND (tw:(("Método Canguru") OR (mãe canguru) OR (método mãe-canguru) OR (método mãe canguru) OR (projeto mãe-canguru) OR (mh:e02.760.670.500*) OR (mh:n02.421.088.120.140*) OR (mh:n02.421.585.700.500*) OR ("Atenção Humanizada ao Recém-nascido de baixo peso") OR (mh:sp2.006.027.023*))) AND (instance:"regional") AND (instance:"regional") |
